# Supplementary material
Source: PubMed Central journal article supplement (PMC4105311)
Supplement: viru-5-619-s01.pdf [file viru-5-619-s01.pdf]

## Supplemental Material to:

Roberto Navais, Jessica Méndez, David Pérez-Pascual,  
Desirée Cascales, and José A Guijarro

The *yypAB* operon of *Yersinia ruckeri* encoding two  
putative U32 peptidases is involved in virulence and  
induced under microaerobic conditions

Virulence 2014; 5 (5)

<http://dx.doi.org/10.4161/viru.29363>

<http://www.landesbioscience.com/journals/virulence/article/29363/>

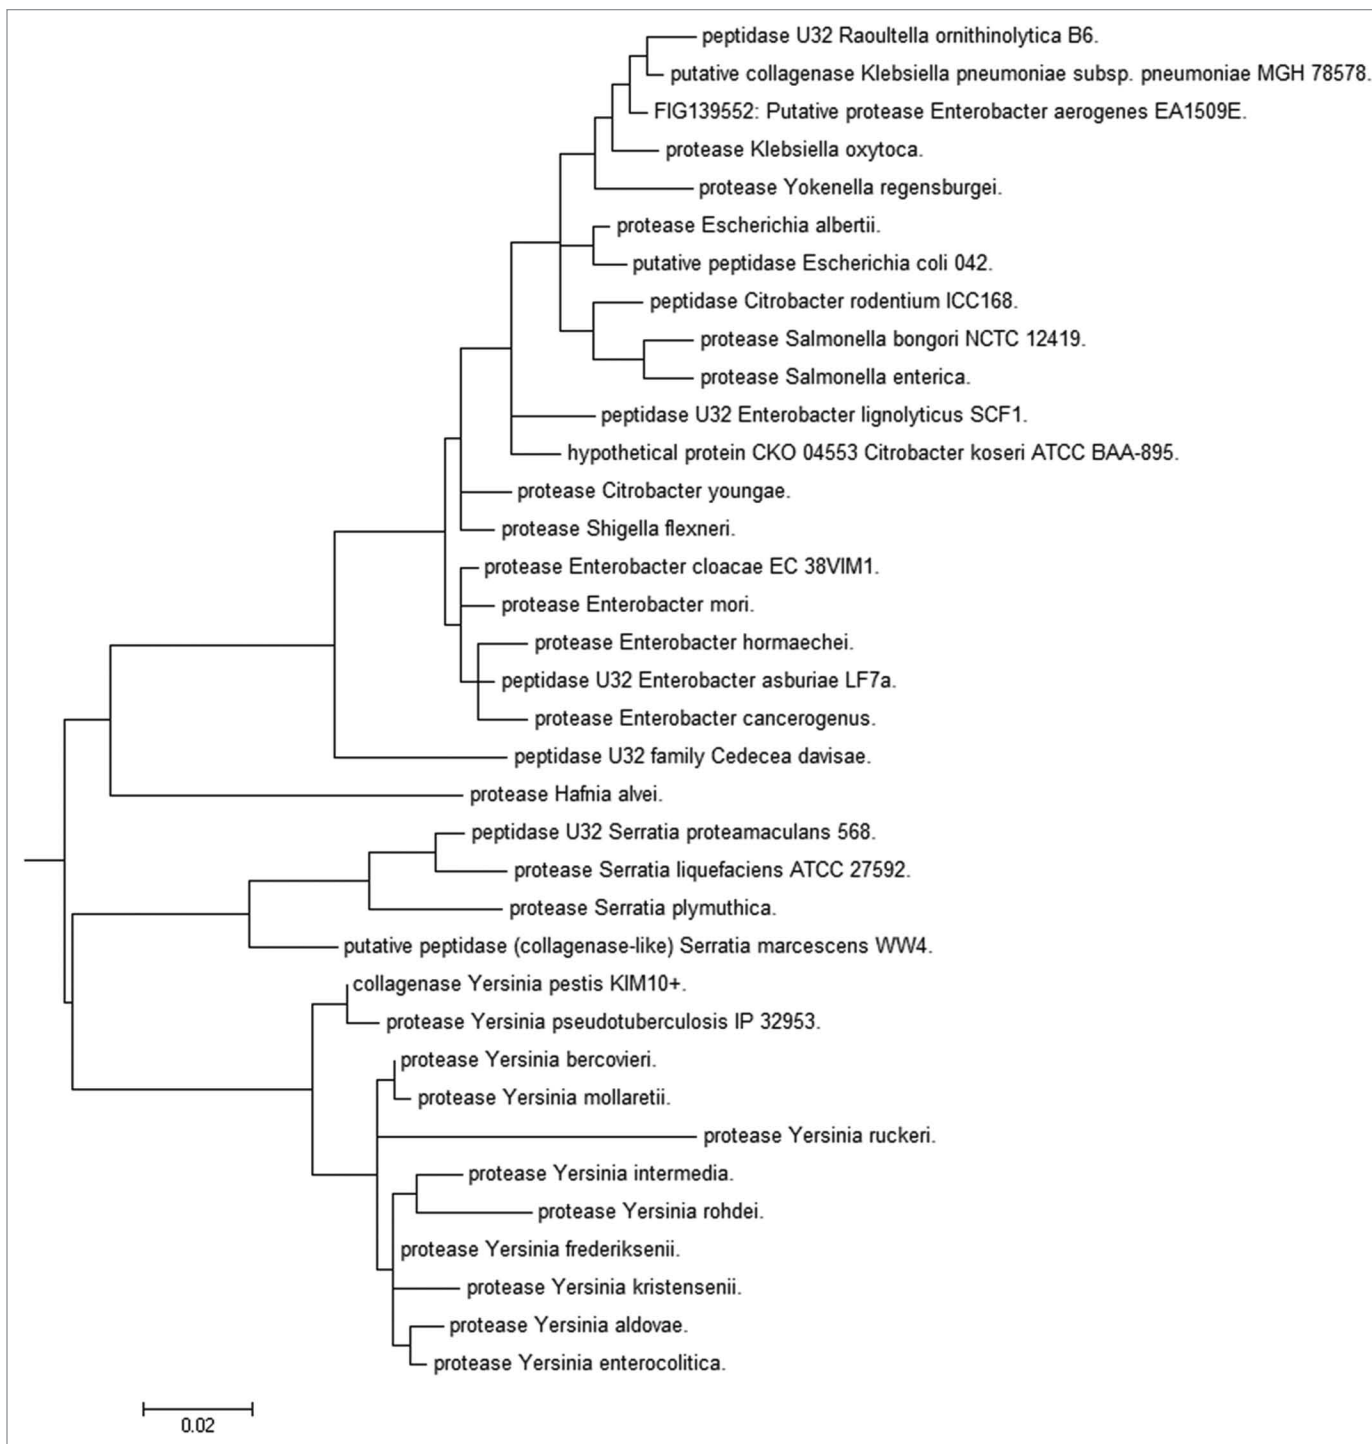

**Figure S1.** Phylogenetic tree based on the YrpA protein sequence, showing the relationships between *Y. ruckeri* and its other relatives. Note that all species grouped within the bottom part of the tree belong to the *Yersinia* genus.

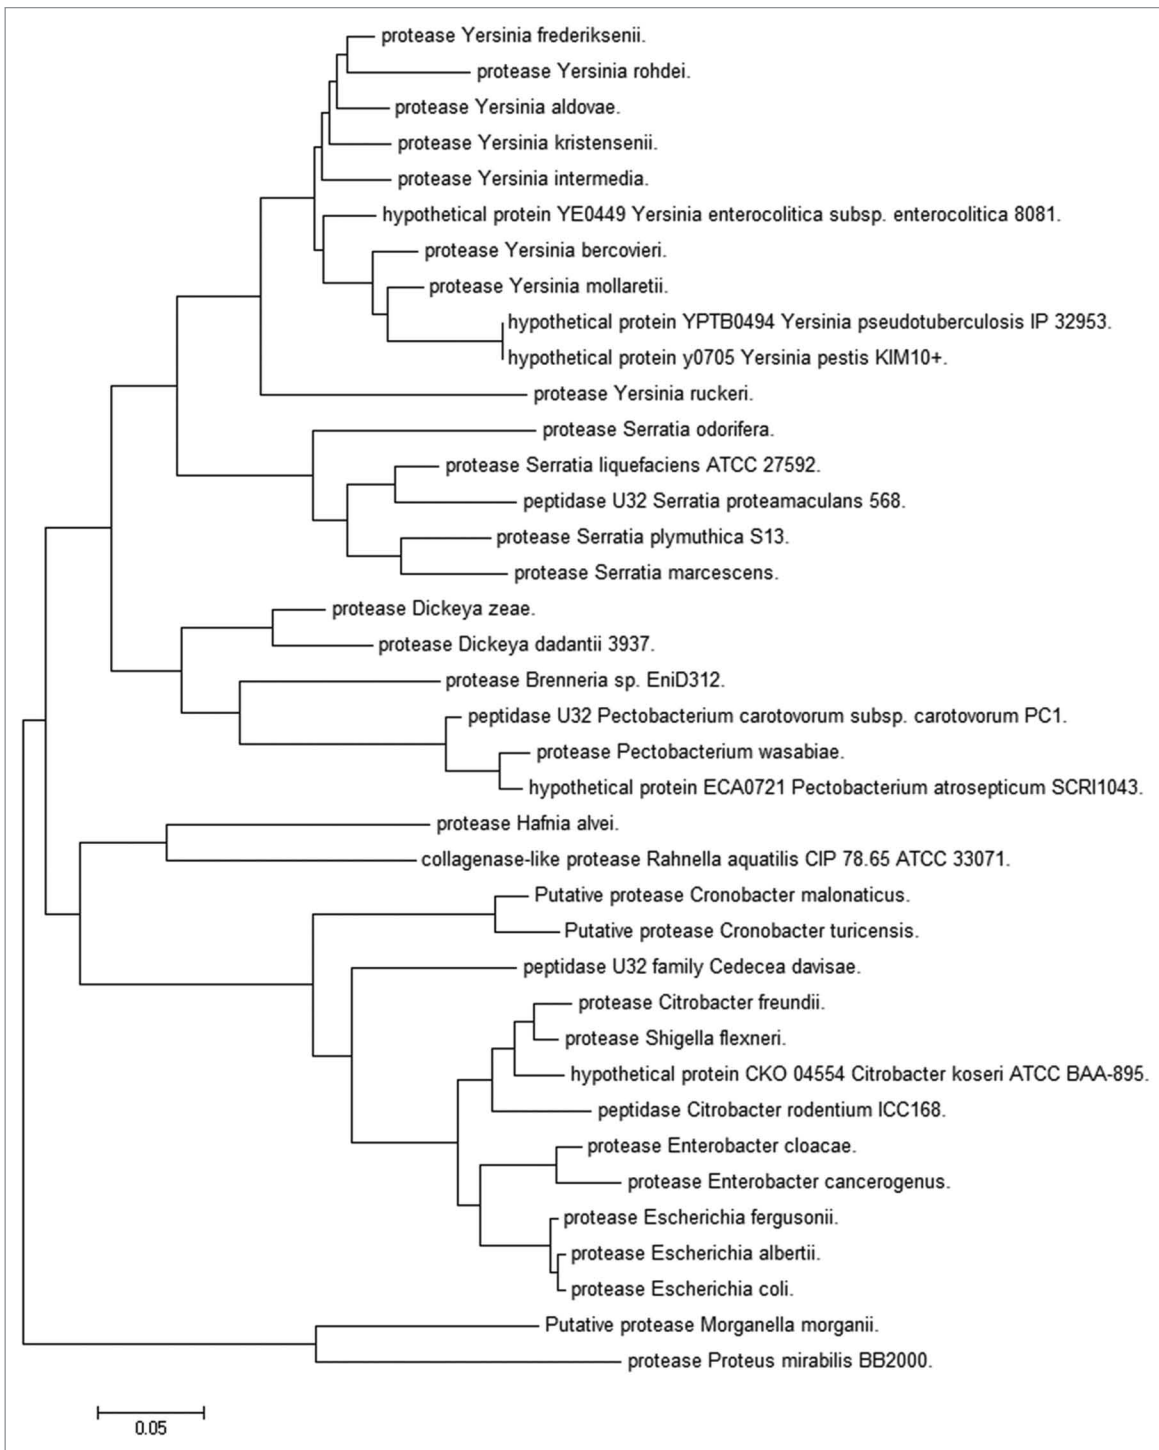

**Figure S2.** Phylogenetic tree based on the YrpB protein sequence, showing the relationships between *Y. ruckeri* and its other relatives. Note that all species grouped within the top part of the tree belong to the *Yersinia* genus.
